# Supplementary material for: Polymorphisms in Anopheles gambiae Immune Genes Associated with Natural Resistance to Plasmodium falciparum
Source: PLoS Pathog. 2010 Sep 16;6(9):e1001112. doi: 10.1371/journal.ppat.1001112 (PMC2940751; doi:10.1371/journal.ppat.1001112)
Supplement: Table S4 — Immune related gene, primer and SNP details. + indicates primers from [37], # indicates primers from [63] and ∧ indicates primers from [64] (Nested Primers). (0.05 MB XLS) [file ppat.1001112.s004.xls]

## Sheet: Feuil1
Gene Name	Putative Function	AGAP	Forward PCR Primer	Reverse PCR Primer	Gene Region	Genotyping Primer Sequence	Chromosome	SNP Location
AgMDL1	Recognition	AGAP012352	ATCTGCCTCGCTGATGATCT	CCAAGATGGCCTCGTGTAAT	Coding	GCACATACCGGGGGTAAA	3L	40910564
					Coding	GCAGTCAGCTCGTTTGCG	3L	40910463
			TACGGCACGGATACGTACAA	ATTCCCGCTACTGTTCATCG	Upstream	CACCTGGTGTCACAGGA	3L	40911948
					Upstream	GAGATCGAGCGAGCGTGT	3L	40912362
					Upstream	GGACGGTGCCCAGTC	3L	40912305
AgMDL2	Recognition	AGAP002857	TTCGAGTGGCTACCGAGAGT	CCGCAGCTCACACAATCTTA	Intron	GGAGGTAAGCGTTTCGTCAC	2R	28318283
					Coding	CTACCGTTGCCGTTCGT	2R	28317930
					Coding	GCGAACAGATACGGGCA	2R	28317909
APL1a	Recognition	AGAP007036	ACCTCCCAGTCTTGGCCTAT	TGGTGTCGTTGAAGTTCTGC	Upstream	GTGCCTTTTTGTATATGTTGAGCAG	2L	41276366
					Upstream	GCGTGTTTGGTTGTTGGGT	2L	41276444
					Upstream	AGGGTTCAAGCCCCAAATG	2L	41276562
APL1c	Recognition	AGAP007033	GGATATAACACTAAACAACC +	GGAAAGATCCACGTCAACCA +	Coding	GGAGCGCATCGAAGACGA	2L	41259161
					Coding	GCTTCAGAATGGTCAACTCCA	2L	41258962
					Coding	CGCGTGGCAGGCTG	2L	41259249
APL2 / LRRD7	Recognition	AGAP005693	AATCCCTCCACCCTATCCAC	AACTGTTGCTCACCGATTCC	Coding	CAGAACGGGCTGGGC	2L	18786108
					Coding	GGACAAATCGTCAAACACGCC	2L	18786047
					Coding	ACGTAGGTTCGGTGGAATTCT	2L	18786257
					Coding	CGATTGAACGACAGATCGAGCG	2L	18786414
			AGGAAACCCGTACGAGAGGT	CATTCGACATGGCACTTCTG	Upstream	GCGYTTAATGAGGTGGTGG	2L	18784235
					Upstream	CGACGGCAAACGTTGCG	2L	18784752
APOD	Lipid transport	AGAP002593	TCATGTCGTTCGTACGGTGT	AAACCCCTGCAAGATGCTTA	Coding	GAAATACTGCACGACCGGA	2R	23677758
			CCTGGTTGAACCCGAGTAAA	CATCGGTACACGATCGACAC	Upstream	CCATCGTTAGATAGTTAAGCCG	2R	23675873
					Upstream	CGCCACGGTAACAGCG	2R	23675896
CASPS1	Effector	AGAP011949	AAGCTGCGAATCGACAAACT	AAAGGGTGCCTGCTGACTTA	Coding	TGTGTTCATTCAAACGTGTCGCG	3L	35503929
CASPS4	Effector	AGAP011951	CGACACAAGTAATGCTAGGCG #	CCATACAGGGCATCTGCTTC #	Coding	CGGCAAGCTGCTTGAGC	3L	35507702
					Coding	CGGAATCTATGCTTATGGTTGCT	3L	35507474
CASPS6	Effector	AGAP004920	TCACTCGTAGCAAGCGTTCC #	TCCTTGCTATTTCCATGCTCC #	Coding	GTACAACGGTTTTAGCAACCTGT	2L	6047570
					Coding	TGCTCGGTTGTGGTAGTTCT	2L	6047606
			TGTCGTTGAACGGTGAACAT	TGTCGTTGAACGGTGAACAT	Upstream	GCACAACCTCTGCAATTGACAT	2L	6045698
					Upstream	CAAAGCCAATTTCCGAACACTCT	2L	6045942
CEC1	Effector	AGAP000693	CAAGCACCACGATAAGCAGA	TGTACAAACACCGACCGAAA	Upstream	GTTGTGCGTTATTCCGCTGTTG	X	12441661
					Upstream	AAGACCAGACACGAGAGCAG	X	12441935
					Upstream	CTCATTCTTGCGCAGCCG	X	12441871
CEC2	Effector	AGAP000692	CTATAAAATGCGCCCGGTTG #	CCGAGGTTTGAACTGCTCAC #	UTR	CGAAGGTGGGGAGTTCT	X	12437668
					UTR	GCACTTTATTGGAACGGTTGTG	X	12437546
CEC3	Effector	AGAP000694	GACCGTTTCCAACCTCAAAA	CAAGCACCACGATAAGCAGA	Upstream	CCGCAAACAAAGCAGCATGA	X	12441793
					Upstream	GAGACACGCTGAGCAGC	X	12442013
Chitinase	Extracellular Matrix	AGAP006414	GGACGGATGATGCGATAGTT	TCACAAAGCGTCGCACTTAC	Upstream	GCACTTGTTGGATATATTGCCG	2L	31611621
CLIPA1	Modulation	AGAP011791	GAAAGTGCGCTCAAGTACCTGT #	GCTCCTTCTCGTACGTGTAGCTC #	Coding	CGATACCCCACATCGACAG	3L	33282601
					Coding	GGCATGGTTCCCTCGAC	3L	33282454
					Coding	GTCGGTGTAGCCTGCTT	3L	33282148
CLIPB4	Modulation	AGAP003250	CAACGAACGCTACATCCTCA	AGTCGCTCGTTACAGGTCGT	Coding	GCTGAAGGTGGAGCTGAC	2R	34472257
					Coding	GCCGGTGAGCAATCCTT	2R	34472245
			GAGCACATTGCCTCAATCAA	CCACACGAATTCTGATGCAC	Upstream	CCGGGTGAACCCTGTTG	2R	34473971
CLIPB6	Modulation	AGAP003252	GGTGGTAGTGGTGGTACATTCG #	GAGTTGGCACAGTCCTGGTC #	Coding	CGTCGAACGTGGTCCGTTT	2R	34479372
					Coding	CGGTGTACTGGCGGG	2R	34479486
CLIPB7	Modulation	AGAP002270	ACCGCTTAACAGGTTTGGTG #	CCTTTCGTCCGATGCTGTAT #	Coding	TCCGTTCGCTCGCGC	2R	18410712
					Coding	TGCAATGCACCGAACATTACC	2R	18410600
CLIPB8	Modulation	AGAP003057	ACTGTGTGACCGGGAAGAAC #	CCCGGTGTACATTTTGATCC #	Coding	GTACTCGCGCAGCCG	2R	31601056
			GGTGAGTCCCGTGCTGTAAT	TGTTTGCCGTACCAAGAGTG	Upstream	ACCACTCCTCAAGATCACCT	2R	31604911
CLIPB15	Modulation	AGAP009844	GGTGGTTAGTTTGTTTGATCGTG #	CATTGAACGTGACATCGCTG #	Coding	CGGGACCTGTGAGCC	3R	44101609
					UTR	AGCTAAAACCCGATGAGGTC	3R	44101810
			GCAGCGATGAGTGCAATTTA	TGCAGGTTTTTACGGGAAAC	Upstream	CGCGACATTCAAGTGGGTTAATT	3R	44099653
					Upstream	CTGCCCTCCCAGACAAC	3R	44100085
					Upstream	GGAAAGAACAGTGTAGACGGC	3R	44100114
CLIPB17	Modulation	AGAP001648	TGGATGGCGAATCTGGTTTA #	CAACGCCATATTGTCCAGGA #	Coding	CGTACCGCGACTTGCC	2R	7280235
			AACTGATGCCGATTCCAGAG	TGGTTGAAGGCAGATTCACA	Coding	CCATCGCTACAAACGTGTCC	2R	7277304
					Upstream	CACAGCTATGCCGGGA	2R	7277884
CLIPD1	Modulation	AGAP002422	ACCAAGCAGCTGTCCAAGAT #	CTCGTCAAACAGCCACTCAA #	Coding	GTGGCGGAAATTCGGGC	2R	21083610
					Coding	GGGCACACAGTTCTTCGG	2R	21083442
CTL2	Recognition	AGAP010707	GCATGGGATCAGTGCATAATG #	CACATAAGGATATTCCCGAGTGC #	Coding	AGTGTAATCAGAAAAGCAGGAGTTAC	3L	8869869
					Coding	CAAGCTGCGTTCCCGAAA	3L	8869856
CTLMA2	Recognition	AGAP005334	CACGCATACCTCTTATCATCGC #	TGTTGACAGATGAACGGCTTC #	Coding	CACGAACCACTGTGATGACAG	2L	14232746
CTLMA6	Recognition	AGAP005332	GAAAACGATCGGTTGGAGAA	CATCGTGGTCACTGGAATTG	UTR	TGACCATTCATCGACGTCCAT	2L	14231217
					UTR	GAGGGGGTATGGGCAAT	2L	14230997
CTLMA3	Recognition	AGAP007412	CGAAACGCTTGGCTAACTTG #	CATGAAGAAGTTGTTCGCCC #	Coding	CCGACGCCTTATACCAGTT	2L	46355428
DCCE2	Effector	AGAP003095	TCGATCTGAACACGAACGAG	AACCATTCTGGTCGATCTGC	Coding	CGCACTGTCCAGCAACTC	2R	32420897
					Coding	GACTCGAACAAACCGTTCGC	2R	32421101
DCElike1	Effector	AGAP010280	AGTGGCACCGTGGTCTTTAC	GCGAGAGGATCAAAATGGAA	Coding	CATTCCTTTGCACGGTTCTACT	3R	51983023
FBN9	Recognition	AGAP011197	ACTACCTACAGTACAAGCTGCTC ^	GGCAGTTGTTGTACCACCAG ^	Coding	AATAATCTAACCGCGCTGCAG	3L	19243015
					Coding	GGTATCGGACAGAACCAGG	3L	19243101
FBN22	Recognition	AGAP010775	TGCAGGACAAACTGAACGAA #	CTGTGTACGATCCGAGCTTTG #	Coding	GACTTTTACCGCAACTGGG	3L	10162302
					Coding	GCACGAAAGCACGAGCTG	3L	10162397
GALE3	Recognition	AGAP004934	AAAGTGGAAACAGCTCGCCT #	CCCATTCCAGTTCGATCAGA #	Coding	TGAACCAGTTCGGCAGCA	2L	6200063
					Coding	CTGGCAGACGTTTCTTGAGATC	2L	6199980
Gambicin	Effector	AGAP008645	TGCGAGATGTAAAAGCATCG	ACCAGAAGCGAAGGTTGATG	UTR	CATCATCGGCAGGACCG	3R	13897086
					UTR	GGTGTTGTGCGAGCG	3R	13897119
			TGGATCAACATGCACGATTC	CACCGAGATGGGGAGTTTTA	Upstream	CTAATCTTTGGACTCGGTAGTCAA	3R	13895909
					Upstream	CACCTCTATTGCCGTCTTCTT	3R	13896298
					Upstream	CGGGTTCTCACAGTGTAGT	3R	13895995
GNBPA1	Recognition	AGAP006761	TTTGGCGTATATGTGGCGTA	CGATGACACTTGCTCTCCAA	Upstream	TGGAGGAAGATCACTTTAAAGACC	2L	37927140
					Upstream	GATACCGCTAGACATGTCAAACAA	2L	37927263
GNBPB2	Recognition	AGAP002798	CGTTCAGCTTCAGGTATGGAA #	GCACGTAGTCAATCTGTAGCGA #	Coding	GCGGCAATATGGACTACCG	2R	27651407
					Coding	GGACAGGGTTGGAACAC	2R	27651275
GNBPB3	Recognition	AGAP002799	GTACCCTGAACATCCATGGTG #	GTTGTTCGACCACGGCTTAC #	Coding	CGATTCTCGGTTGACAACCAG	2R	27646236
					Coding	CGAGGGGTTCGGTCC	2R	27646378
					Coding	GTTCCAGAAACCAGTGCC	2R	27646216
HECY1	Effector	AGAP001659	CGATCCGGTGTTCTACCAGT	GAAAGCGTCTGATCGTAGCC	Coding	CGTGACCAGCTTGTCCAT	2R	7553532
HECY2	Effector	AGAP001657	GAAGAAGTTCGGCAAGATCG	TGCGTTAACCAAATCCCTTC	Coding	GCATGCCGTTCCAGCT	2R	7535177
					Coding	CCCTTGGGCAGCATCA	2R	7535221
ICHIT	Recognition	AGAP006432	CCGTTGCCGCACTATTTTAT	GTTGTTGGAGGGTACGCTGT	Coding	GCATGGGAGTATGAGTGTCC	2L	31789378
					Coding	CCACCACCACCACCA	2L	31789719
					Coding	CAACAGCCACAACAACAACGC	2L	31789770
IMD	Signal Transduction	AGAP004959	TTACGGGGACGAGACTATGG	TAACTACTCCGCTCGGGAGA	Coding	GGAGCATCACACAGCGACA	2L	7194947
					Coding	GGAAGCACCTTCGTCCAC	2L	7195096
IRSP1	Effector	AGAP006421	CACGTGAGCTTGAGGAAACA	GTGAAGTGTCCGATCGGTTT	Coding	TTCACAATGGCCATCTGGATAG	2L	31693780
					Coding	CTGACCACCGAGAGGAC	2L	31693882
IRSP2	Effector	AGAP000603	AGTTTCCGCACAGACGAGAT	TTCGACGCAATACGAAATCA	Coding	CATCTACTGCGCGAGTATCG	X	10719721
					Coding	CCTCATCGGCCATCACG	X	10719656
IRSP3	Effector	AGAP001508	TTCTTTCCCACACCACCTTC	AGGCGAATTTCTCAAAAGCA	Coding	CTTCGGCGGATCGGG	2R	5710532
					Coding	ATCCCGAGAATCCACCGAA	2R	5710448
			AACGGTGGGTTGTCACATTT	GGCCAGGCTCTTTGTAACTG	Upstream	GCTGTTTAACCCGCTGACTG	2R	5711914
IRSP5	Effector	AGAP000151	TCTGTCGTGTGCACAGTTGA	CTGACAAATTGGCTGCACTG	UTR	CTACCTGCTCCAACCACA	X	2455527
					Coding	CTGGCACCCGAGCC	X	2455264
LRIM1	Recognition	AGAP006348	ACGGTGCAATACACGAGATAAAG #	CCTTAGCGCTTTCTCGATCA #	Coding	ACAACTACGTCCAGGAGCT	2L	30330835
					Coding	ATATTGTTGTTCGCTGC	2L	30330805
			TCGTACCACAATCGACCGTA	CCTCGCCAGTGATTAGCTTC	Upstream	GAAAAGTATTTCGACCCAAACGCT	2L	30331459
LRRD5	Recognition	AGAP007039	ATCGTCTCGCCACGATTTAC	TGCTCTAGCTCCGCTTTCTC	Coding	GGCAATGGGCTGGTGAAT	2L	41293273
					Coding	TCCCCGAGCGTGATCG	2L	41293315
PGRPLb	Recognition	AGAP001212	CTTCCAGGATTTCGGTTGAA	CGCGAGGGTACTTGTTGATT	Upstream	TCCTCCATCGAGATCATCACG	2R	1592138
					Upstream	CACTGTTTGCGGTTACGGTAG	2R	1591782
PGRPS1	Recognition	AGAP000536	GGCTTTGCGCTTGAAGATAC #	CGGTCTGGTGGTAGGTCTGT #	Coding	GTATGTTTGCCACCATCTCCTT	X	9623097
					Coding	TAGGTGACGTTCTTCGACTTG	X	9623191
			AGAGAAGATGCGTTGCAGGT	TTTCGAACAACGGTCTACCC	UTR	AGAGTCACTCTGAGCACAAATCAA	X	9623410
PPO2	Effector	AGAP006258	TGCGCAATCTGACCAACTAC #	CGACTCATTGTTCACCTCCA #	Coding	CGTCCAGCATGATGCGGTT	2L	28704413
					Coding	CCATCACGCCGTAATCCTC	2L	28704257
PPO3	Effector	AGAP004975	CCAACGTTCTACCCAAAGGA #	AATCAACTGCTGGTGCATGT #	Coding	CCGCTTCGGAAACGATGC	2L	7443893
PPO9	Effector	AGAP004978	CCCGAACGCTATCAACGTAT #	TCAGCAGCTTCGGGAAGTAT #	Coding	ACCGTGGCGTGGTACA	2L	7457667
REL1	Signal Transduction	AGAP009515	CTCCAACCAGTACCAGCTGC #	TGTCGCTAAGAGAGCCTTTATTG #	Coding	GCCTACACCACACTCGG	3R	35055543
					Coding	GCTGGACCCAACCGTT	3R	35055426
REL2	Signal Transduction	AGAP006747	GGTCGCACCTATGCCAGTGC ^	ACACCCTCCGATGGTTCAGC ^	Coding	CGCCGGCACGATGAACTA	2L	37737821
					UTR	CAAACGCTGAAATGGGGACA	2L	37737570
SCRBQ2	Recognition	AGAP010133	TGGATCGTCGAACTATGACAAC #	AAATGTCCGATGGGAAGAGTG #	Coding	CGTACTGTTAGCGTTCCAGA	3R	49293744
					Coding	GCTTAGTACCGTTCTTCGTCTT	3R	49293662
SpSNAKElike	Modulation	AGAP012946	ACGCTAATACCGCTCACGAT	CCCCACACGTTGTCCTCTAT	Coding	GGCATCCGAACTACTCGAAC	2R	40693588
					Coding	CACAAAGTCCTGCTCATACGG	2R	40693950
					Coding	GAGAACGGAAACCAATGGGA	2R	40693407
			TTAGCCAGGAGCGAACTGAT	TTTGGCATTGTACGTTGCAT	Upstream	CAGCGTGGTCTACAGTTTCC	2R	40688798
					Upstream	AATCCCATGTGTCGGTCCA	2R	40688481
SPONDIN fragment	Extracellular Matrix	AGAP011765	GACCGGAAGCATCACAAGAT	CAACACTGATGTGGGGACAC	Coding	GAGCGTATGCACCGCAT	3L	33008007
					Coding	CGGCGACGGTCGATGAG	3L	33008425
SpPPOactivate	Modulation	AGAP004638	CCAACCGATAGTAGCCCGTA	AGTGTTAGAGCACGCCCAGT	Upstream	AATCACTTGATATTAGAGTGGCA	2R	58805511
					Upstream	GAGACAAATTTGGATGCGTAACGT	2R	58805968
SPZ4	Modulation	AGAP007866	CACATATCGGTGCTGAAGGAG #	GAGATCTTGTCGGCGGTAGAC #	Coding	CTCATTCAGCGGGATCTCATT	3R	2370169
SRPN11	Modulation	AGAP001377	CTCCTGTCAACGATTTAAAGGC #	ATGGTTTCGGAAGCAAGTCTT #	Coding	AGACCCGCATCGCCT	2R	4018732
SRPN14	Modulation	AGAP007692	TTCAGCCTCAGCCTGTACAAG #	ATAATCCACAGGGCCGAATC #	Coding	CGATCGAGTACAGCATCGC	2L	49085437
STAT2	Signal Transduction	AGAP000099	GAGAAGGCGTTCAAAACGAA #	GTGTTCGGGAAGCTGTTCAT #	Intron	TCCCCAAACGGCTGC	X	1611894
					Intron	CCGCAAACAAAACGTTTCAGATTCG	X	1611919
TEP1	Recognition	AGAP010815	CGTTACGTTACCGGTAGCTTTC #	TTCTGCTTGTCCACTTCGTACA #	Coding	GACTACACCGTTCAACTGAAGTA	3L	11202849
					Coding	GTTCTGTTTCTCCAGGTCTAGTT	3L	11202674
			GGTTAAGGCATTTGCTGCAT	CGGTCAGTTTGCATCCCTAT	Upstream	CAGTGAGCCAAAGAACTTACTATG	3L	11207232
					Upstream	GCCACTGGAATCGGTATTTCT	3L	11207077
TEP4	Recognition	AGAP010812	ACCGCGGCAAAGTACATATC #	GTTTGCGTTGGTTACCGATT #	Coding	CGTCTCATCCACACCCT	3L	11006648
TEP14		AGAP008368	CCTTACTCTTCCTCCAGACAACG #	TTCGTGATTGATAGCGTTTCG #	Coding	ACGAGTGCGGTGGTGT	3R	10084406
					Coding	AGAAAGCTGCTGGTAGCC	3R	10084487
TEP15	Recognition	AGAP008364	CGACCATACAGAACCTGGACTC #	GAATCACTGTCGGTCGTTGC #	Coding	CCCGCCTCCATGAACTT	3R	10063388
					Coding	TGTCGGTCGTTGCCTTCG	3R	10062910
TOLL10	Signal Transduction	AGAP011187	ACGCGTCCACGATCTATCTG #	GCACATAGCCACCACCAATC #	Coding	TCGAGAACAACTACATCAACGA	3L	18558100
					Coding	CCACCGATTGCCGTCCAA	3L	18558304
					Coding	CACTTCGCCCGCCTC	3L	18558484
TOLL11	Signal Transduction	AGAP011186	GCGACCGACATCTATCTGGA #	CATGATCGTCAGCACCAAAC #	Coding	GGGCGAGTTCCAGTGTG	3L	18356896
					Coding	CGATTTCTGGTAATAGAACGACCT	3L	18356615
					Coding	CCTTCACCACGTCCGG	3L	18356912
					Coding	CCGCAAACGTCTTGTTGTTGAG	3L	18356462
TOLL6	Signal Transduction	AGAP012387	CCTCTCGATCCTCTGCAATG #	TGCAGCTGCTCTAGTTTGGAG #	Coding	CAGATCGCCCAACCCG	3L	41490803
Transferrin	Iron Transport	AGAP000376	CATTCCTACGGGCAGTAAGC	GAAGTACTTGCGCACGTTGA	Coding	GCGGCAGCTTCAGCAC	X	6870354
